# Supplementary material
Source: ML conference proceedings conference paper supplement (https://proceedings.mlr.press/v139/si21a.html)

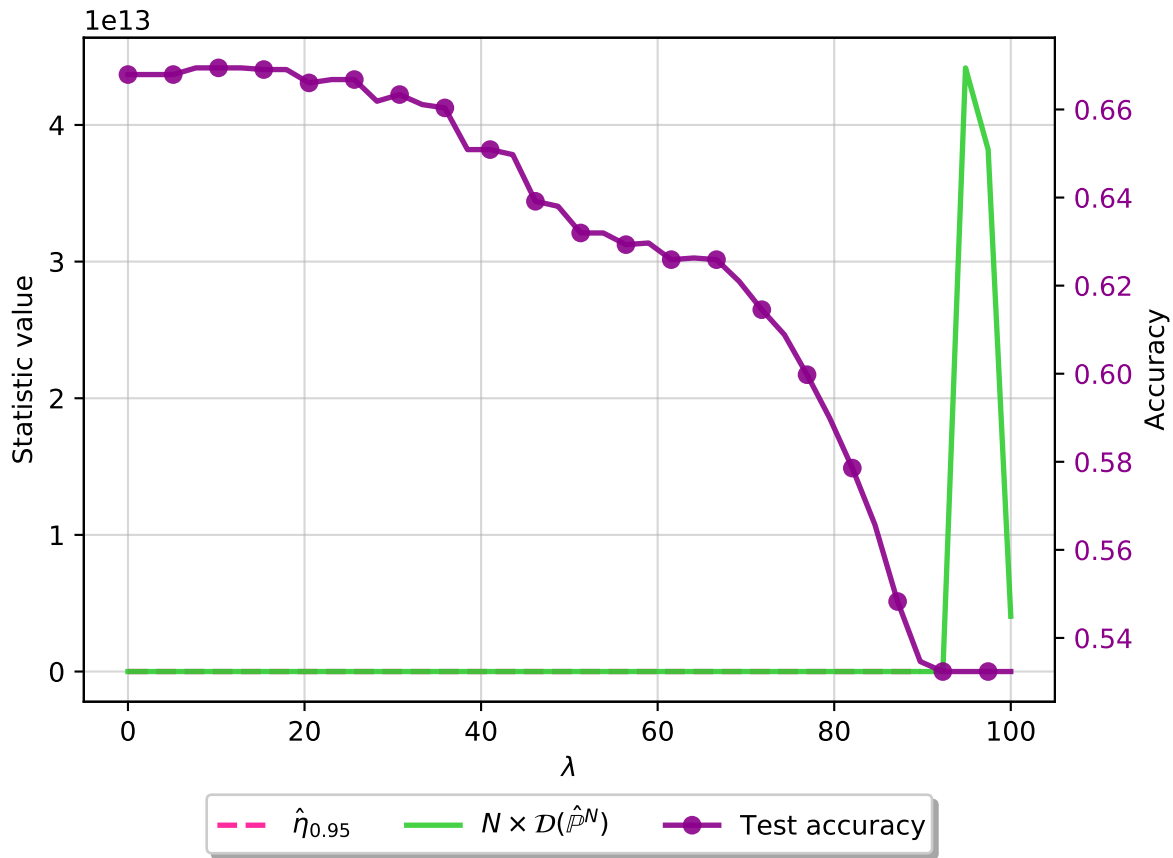

Supplement: Supplementary file 1 [file si21a-supp.zip]

Statistic value

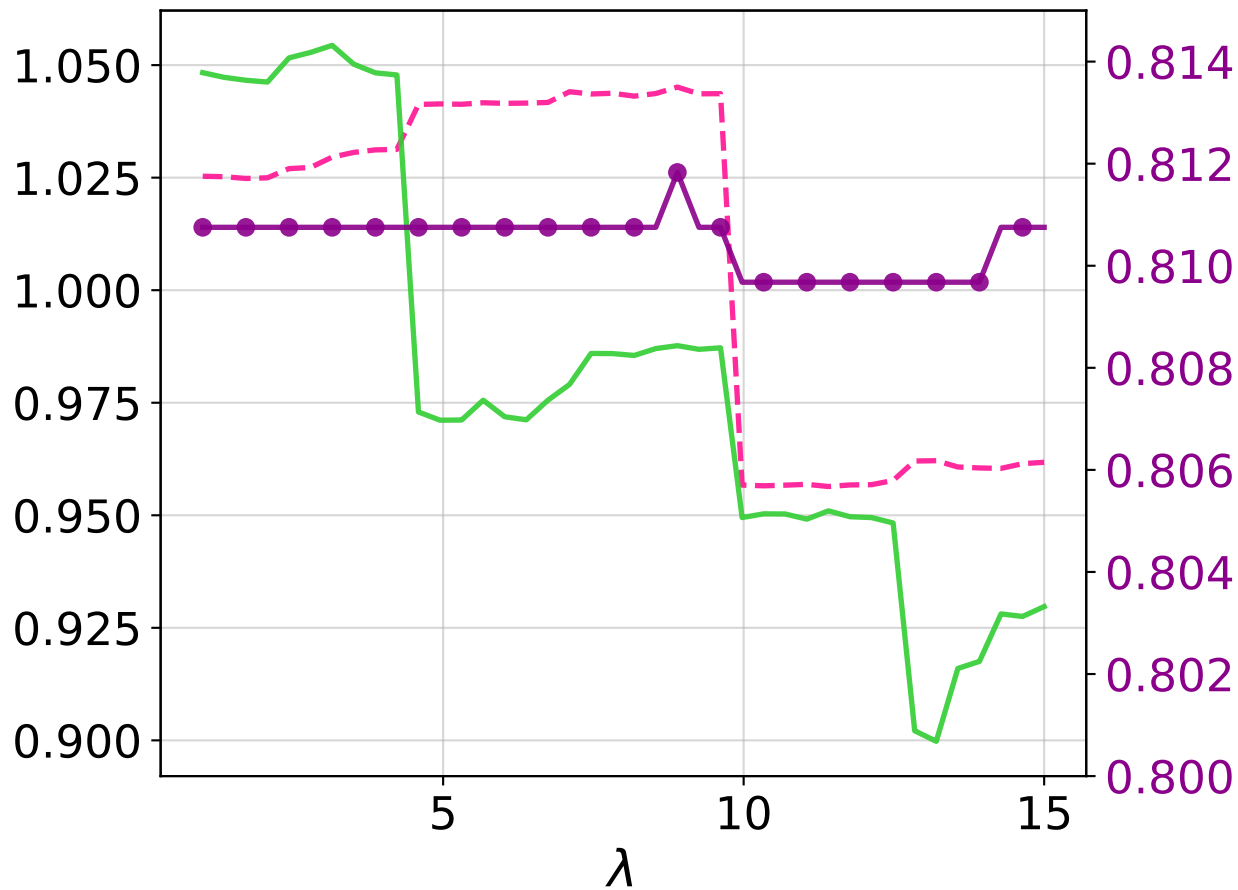

Accuracy

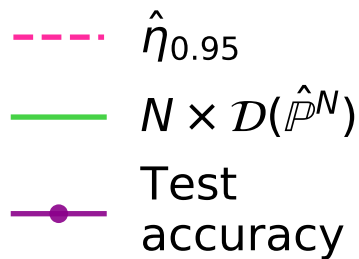

Supplement: Supplementary file 2 [file si21a-supp.zip]

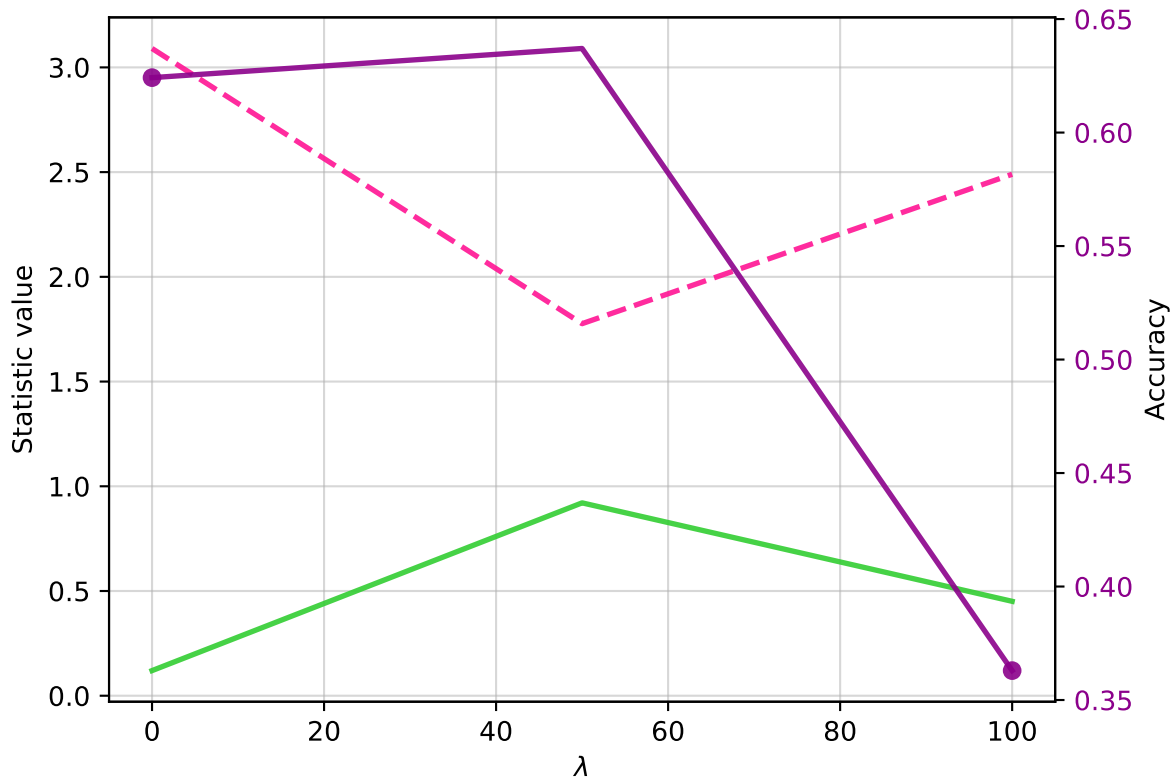

---  $\hat{\eta}_{0.95}$     —  $N \times D(\hat{P}^N)$     —●— Test accuracy

Supplement: Supplementary file 3 [file si21a-supp.zip]

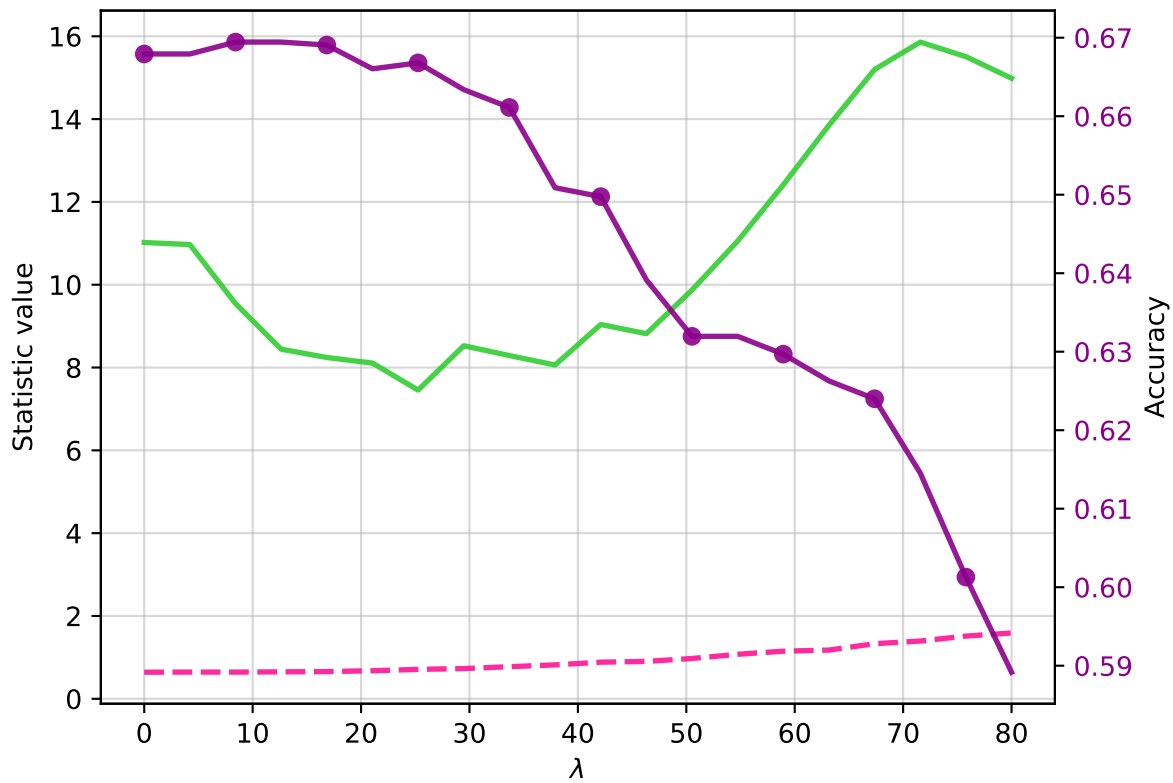

---  $\hat{\eta}_{0.95}$     —  $N \times \mathcal{D}(\hat{p}^N)$     —●— Test accuracy

Supplement: Supplementary file 5 [file si21a-supp.zip]

Statistic value

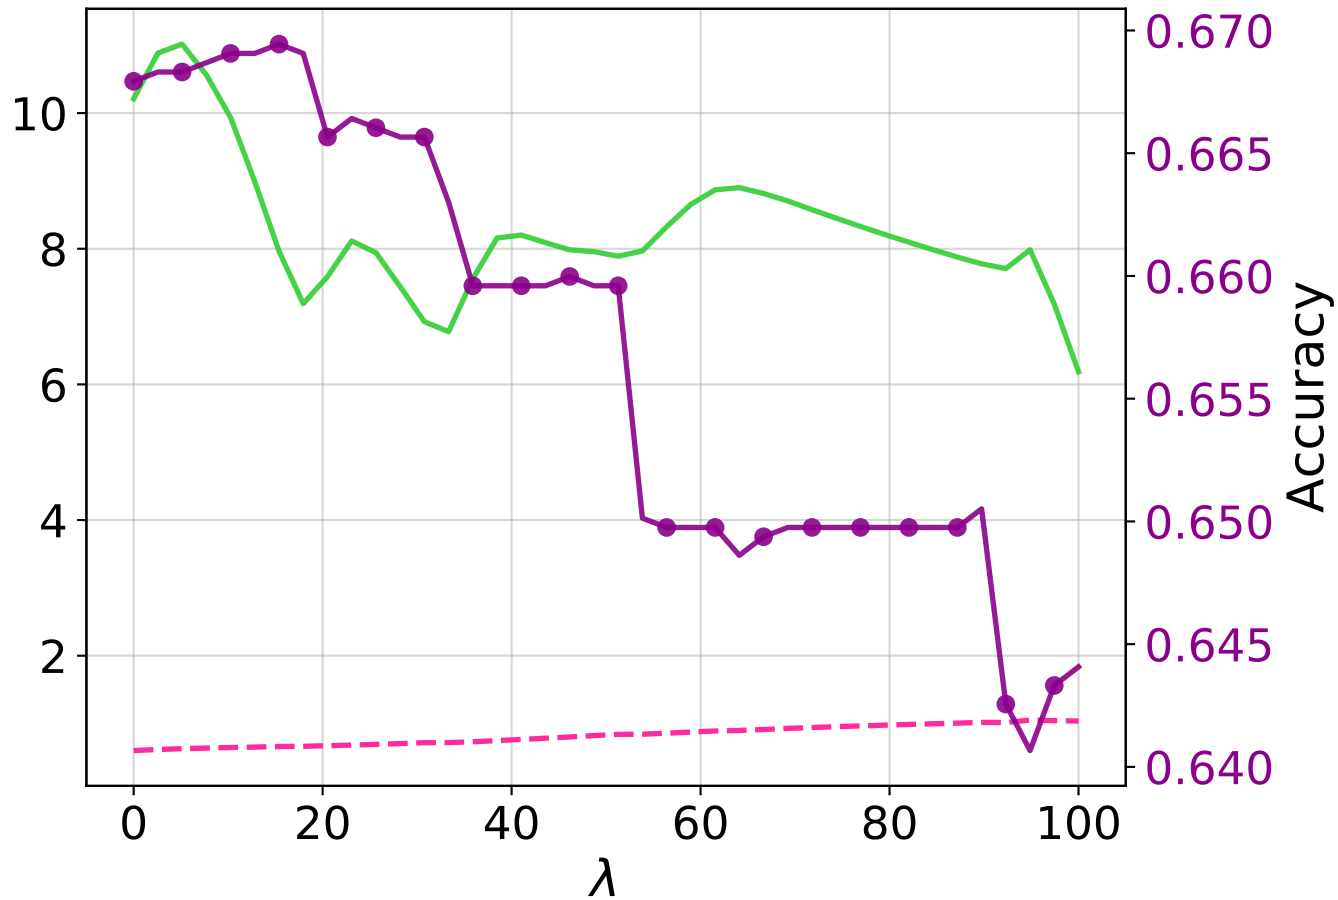

Accuracy

Supplement: Supplementary file 6 [file si21a-supp.zip]

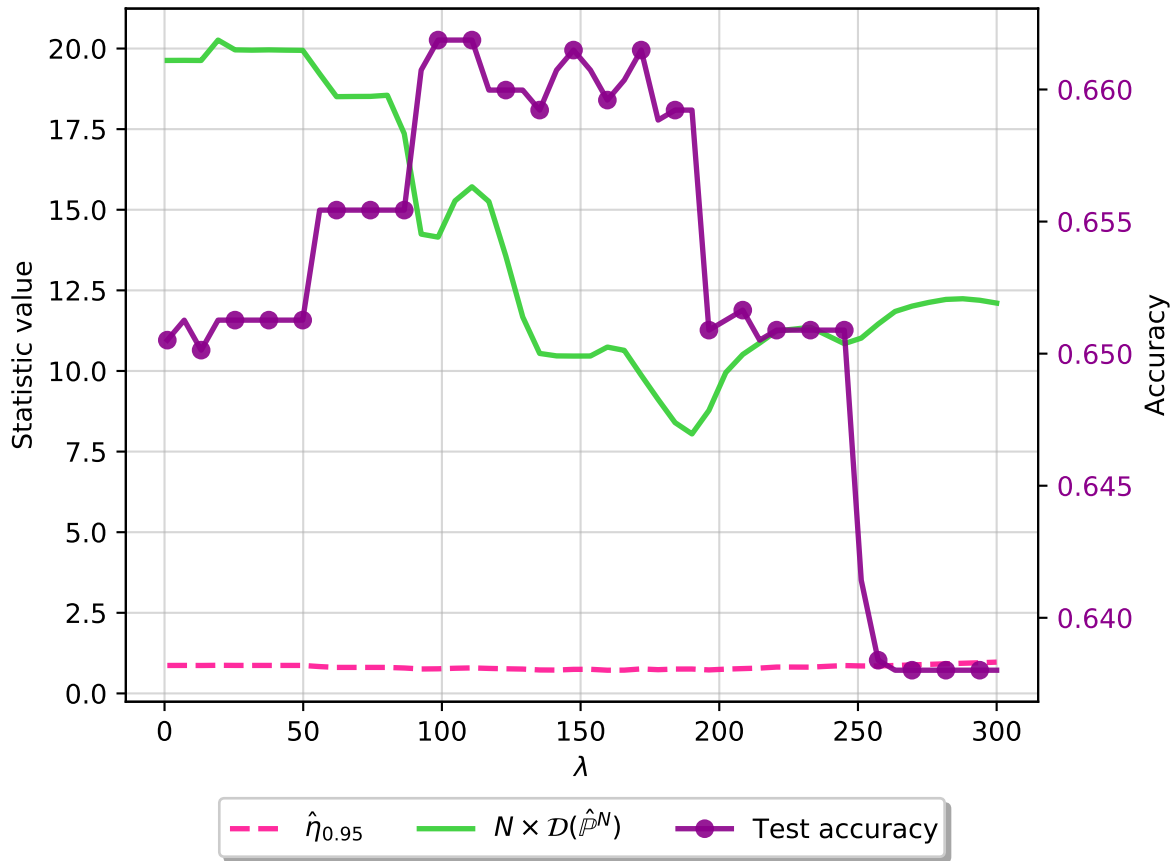

Supplement: Supplementary file 7 [file si21a-supp.zip]

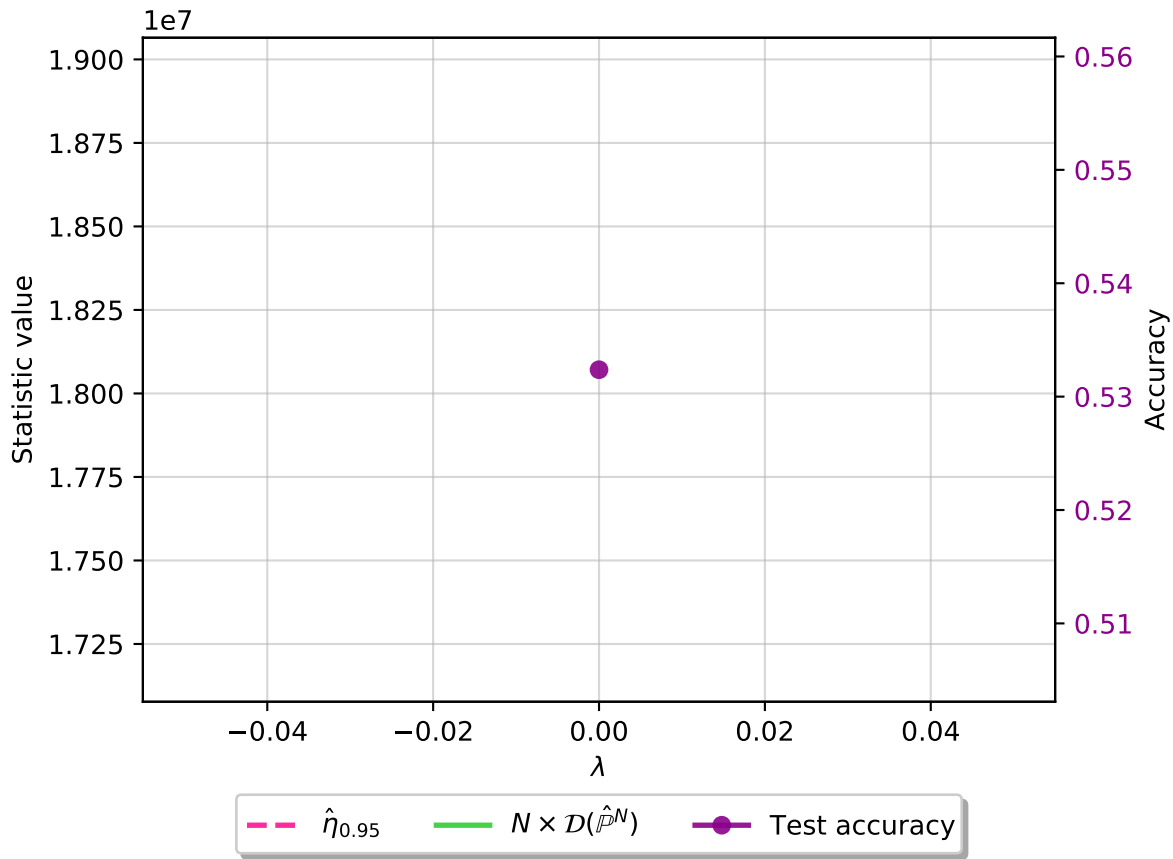

Supplement: Supplementary file 8 [file si21a-supp.zip]

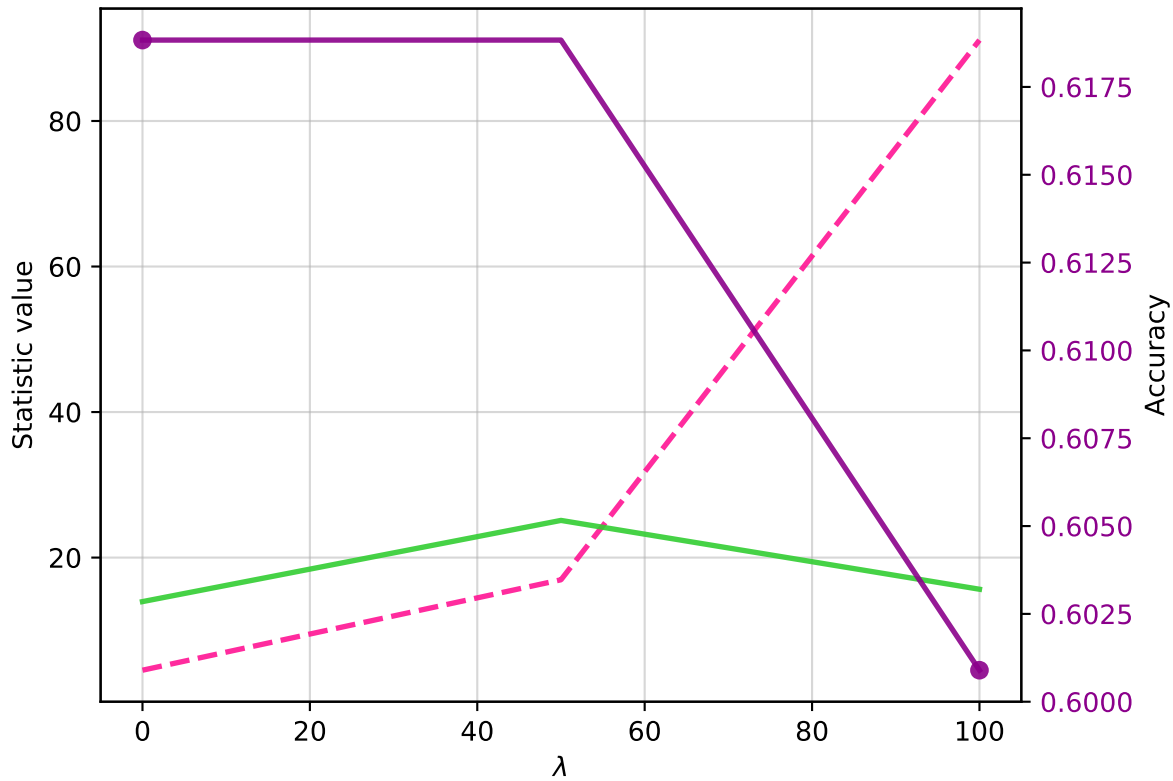

---  $\hat{\eta}_{0.95}$     —  $N \times D(\hat{p}^N)$     —●— Test accuracy

Supplement: Supplementary file 9 [file si21a-supp.zip]

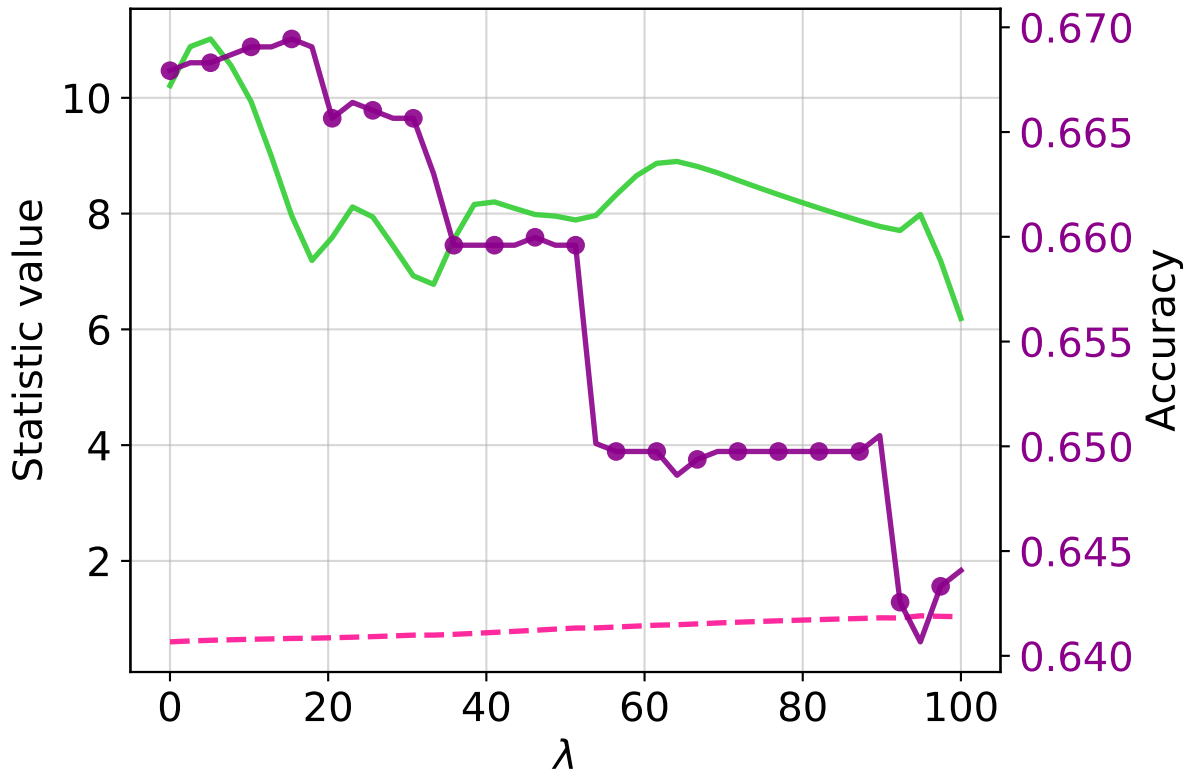

---  $\hat{\eta}_{0.95}$      $N \times \mathcal{D}(\hat{P}^N)$     Test accuracy

Supplement: Supplementary file 10 [file si21a-supp.zip]

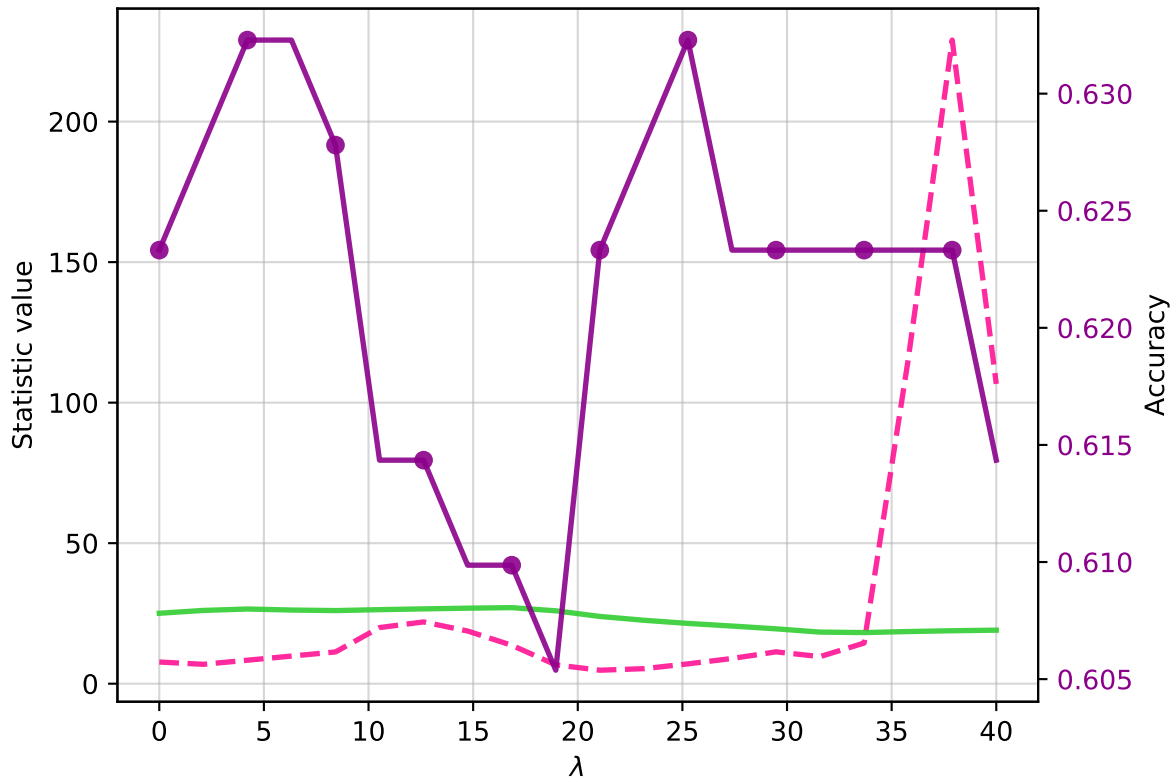

---  $\hat{\eta}_{0.95}$     —  $N \times \mathcal{D}(\hat{p}^N)$     —●— Test accuracy

Supplement: Supplementary file 11 [file si21a-supp.zip]

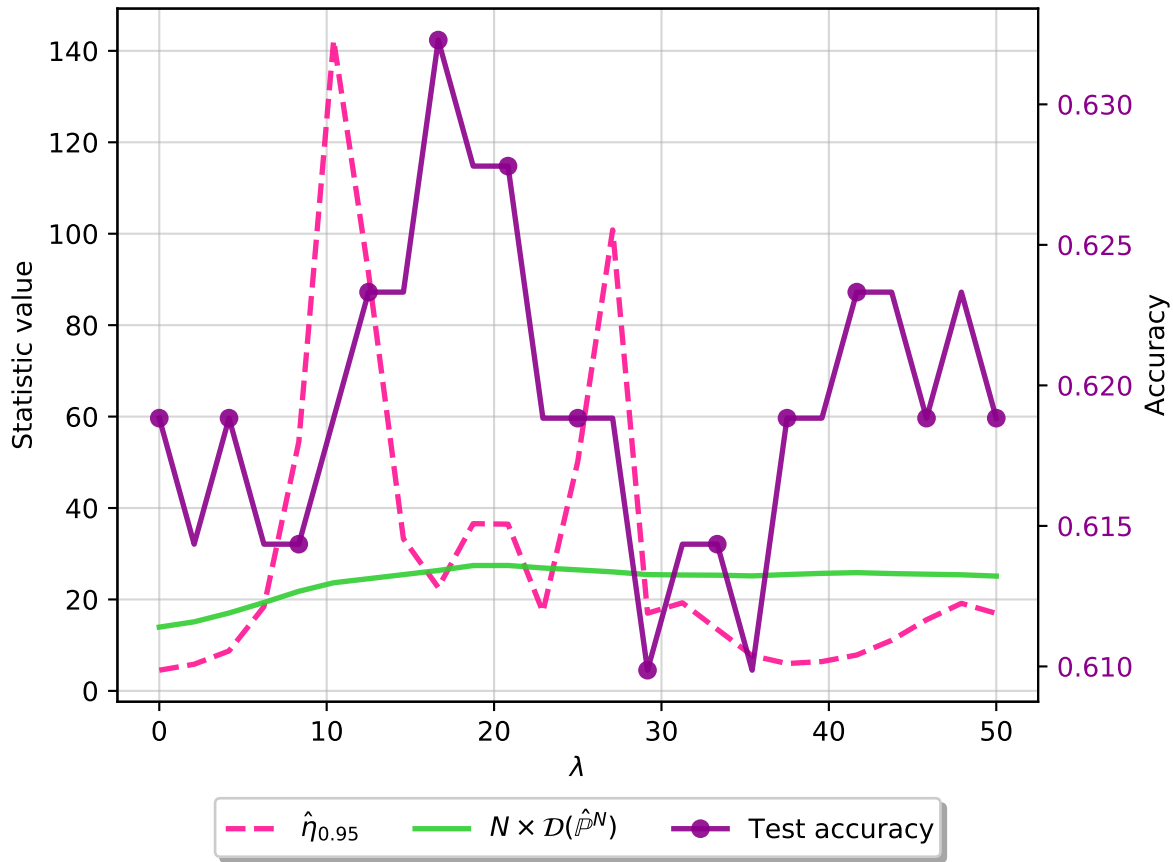

Supplement: Supplementary file 12 [file si21a-supp.zip]

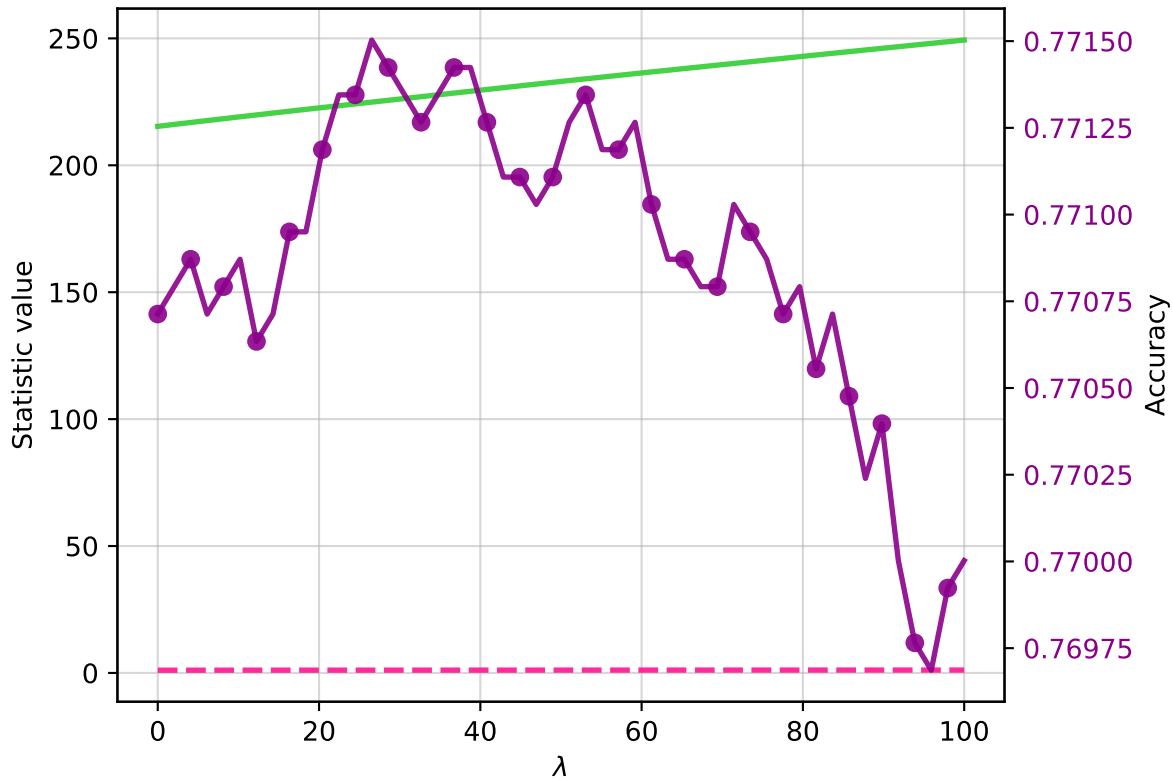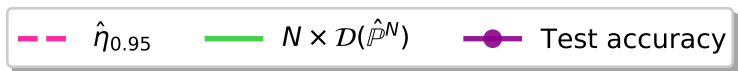

Supplement: Supplementary file 13 [file si21a-supp.zip]

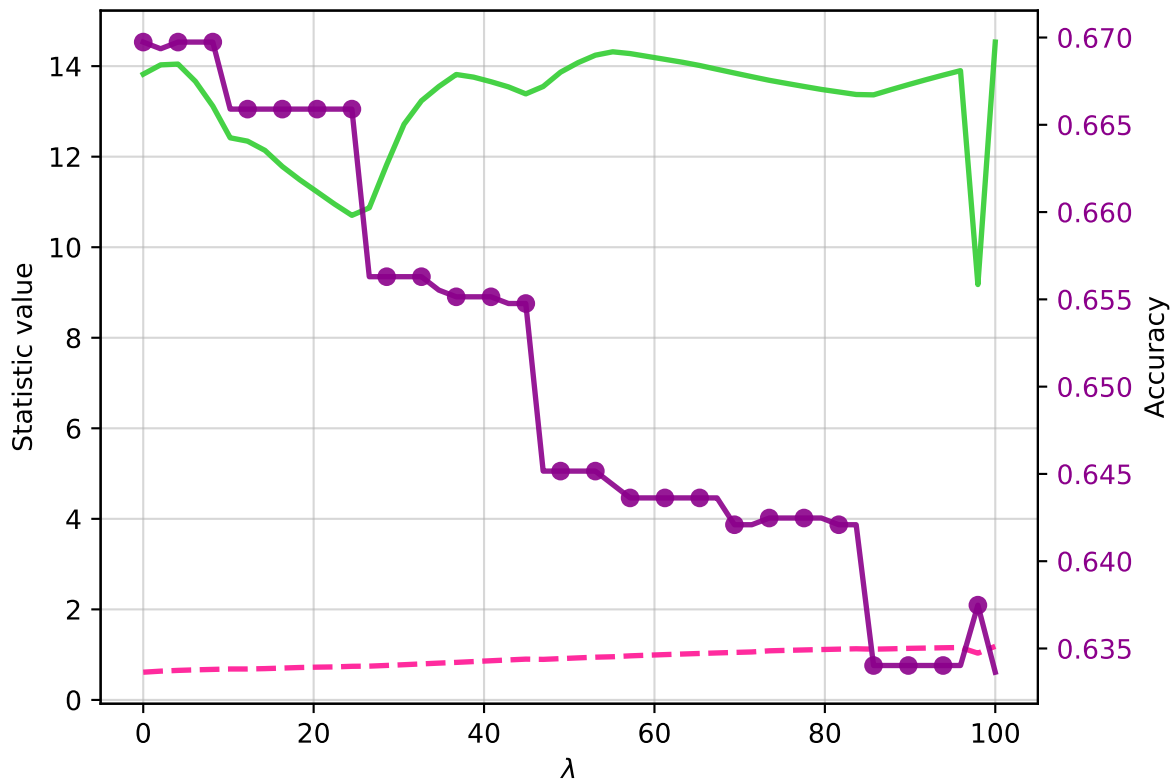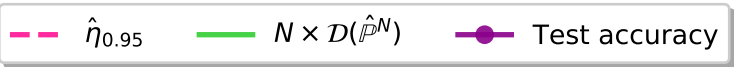

Supplement: Supplementary file 14 [file si21a-supp.zip]

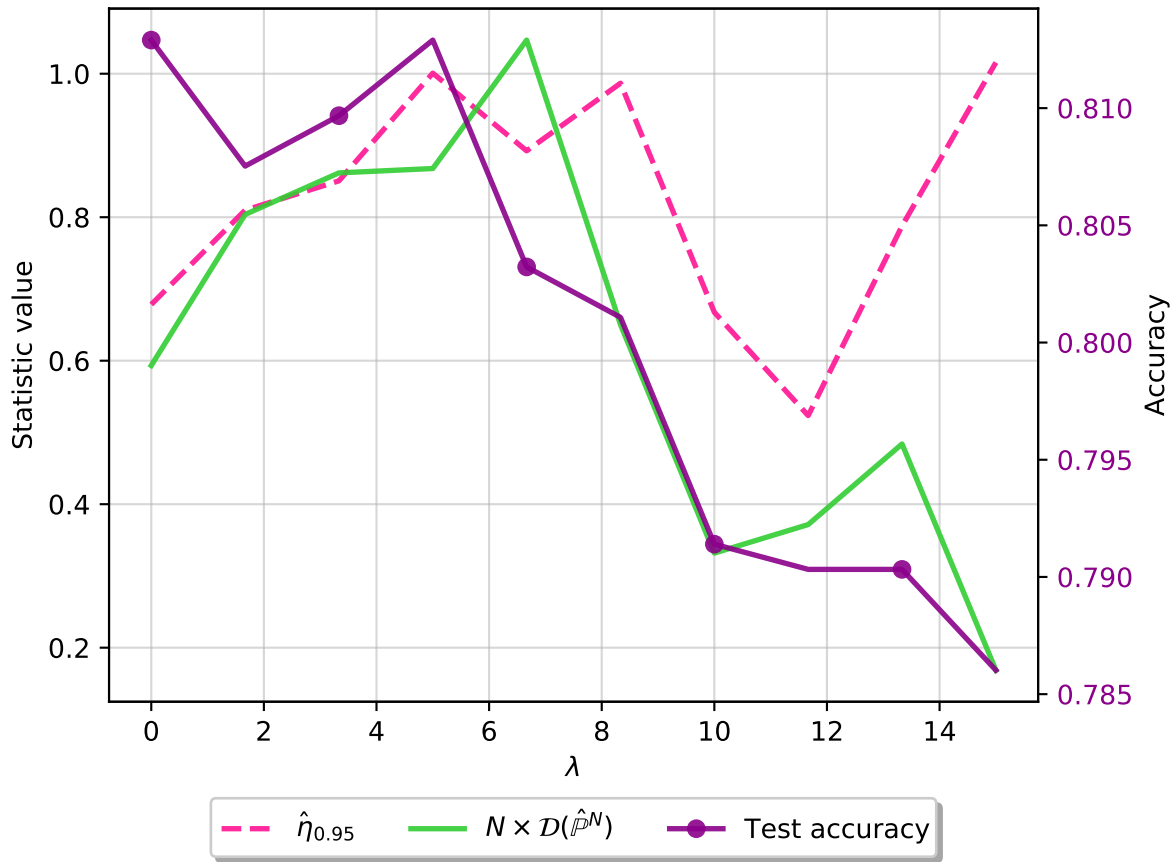

Supplement: Supplementary file 15 [file si21a-supp.zip]

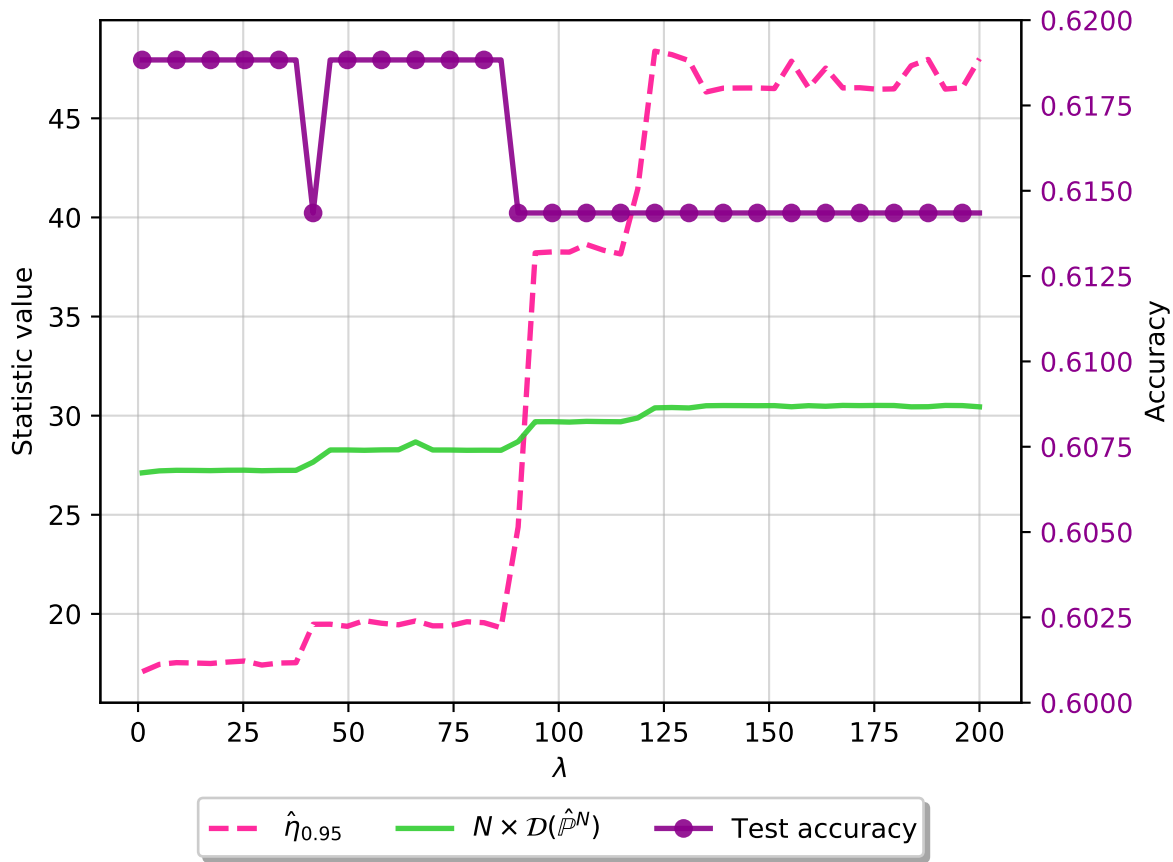

Supplement: Supplementary file 16 [file si21a-supp.zip]
